# Supplementary material for: Regioisomer effects of [70]PCBM on film structures and photovoltaic properties of composite films with a crystalline conjugated polymer P3HT
Source: Royal Society of Chemistry journal article supplement (doi:10.1039/c7ra08618k), 2017-01-01
Supplement: c7ra08618k1.pdf [file c7ra08618k1.pdf]

Supplementary Information for

# Regioisomer Effects of [70]PCBM on Film Structures and Photovoltaic Properties of Composite Films with a Crystalline Conjugated Polymer P3HT

Tomokazu Umeyama,<sup>a,\*</sup> Sho Shibata,<sup>a</sup> Tetsushi Miyata,<sup>a</sup> Kensho Igarashi,<sup>a</sup>

Tomoyuki Koganezawa,<sup>b</sup> and Hiroshi Imahori<sup>a,c,\*</sup>

<sup>a</sup>Department of Molecular Engineering, Graduate School of Engineering, Kyoto University, Nishikyo-ku, Kyoto 615-8510, Japan

<sup>b</sup>Japan Synchrotron Radiation Research Institute (JASRI), SPring-8, 1-1-1 Kouto, Sayo, Hyogo 679-5198, Japan

<sup>c</sup>Institute for Integrated Cell-Material Sciences (WPI-iCeMS), Kyoto University, Nishikyo-ku, Kyoto 615-8510, Japan

*e-mail: umeyama@scl.kyoto-u.ac.jp, imahori@scl.kyoto-u.ac.jp*

*Fax: +81-75-383-2571; Tel: +81-75-383-2568, +81-75-383-2566*

**Table S1.** Photovoltaic parameters of the devices with the configuration of ITO/ZnO/P3HT:mix-[70]PCBM/MoO<sub>3</sub>/metal reported in literatures.

| metal | $J_{SC}$ (mA cm <sup>-2</sup> ) | $V_{OC}$ (V) | FF          | PCE (%)   | ref            |
|-------|---------------------------------|--------------|-------------|-----------|----------------|
| Al    | 10.1                            | 0.54         | 0.361       | 2.0       | S1             |
| Al    | 8.2                             | 0.60         | 0.59        | 2.9       | S2             |
| Ag    | 10.3                            | 0.54         | 0.59        | 3.3       | S3             |
| Au    | 10.4±0.2                        | 0.563±0.005  | 0.548±0.009 | 3.21±0.10 | – <sup>a</sup> |

<sup>a</sup> Data of the device based on P3HT:mix-[70]PCBM obtained in this study.

### References in Table S1

- S1. M. Thambidurai, J. Y. Kim, J. Song, Y. Ko, N. Muthukumarasamy, D. Velauthapillai and C. Lee, *Sol. Energy*, 2014, **106**, 95.
- S2. E. Polydorou, A. Zeniou, D. Tsikritzis, A. Soultati, I. Sakellis, S. Gardelis, T. A. Papadopoulos, J. Briscoe, L. C. Palilis, S. Kennou, E. Gogolides, P. Argitis, D. Davazoglou and M. Vasilopoulou, *J. Mater. Chem. A*, 2016, **4**, 11844.
- S3. C. E. Song, K. Y. Ryu, S.-J. Hong, C. Bathula, S. K. Lee, W. S. Shin, J.-C. Lee, S. K. Choi, J. H. Kim and S.-J. Moon, *ChemSusChem*, 2013, **6**, 1445.

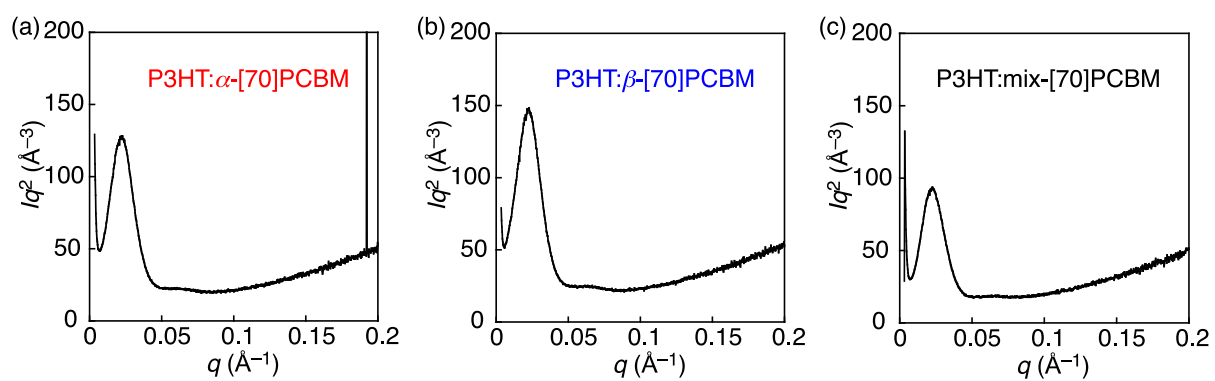

**Fig. S1** Lorentz-corrected scattering patterns for (a) P3HT: $\alpha$ -[70]PCBM, (b) P3HT: $\beta$ -[70]PCBM, and (c) P3HT:mix-[70]PCBM films on glass substrates.

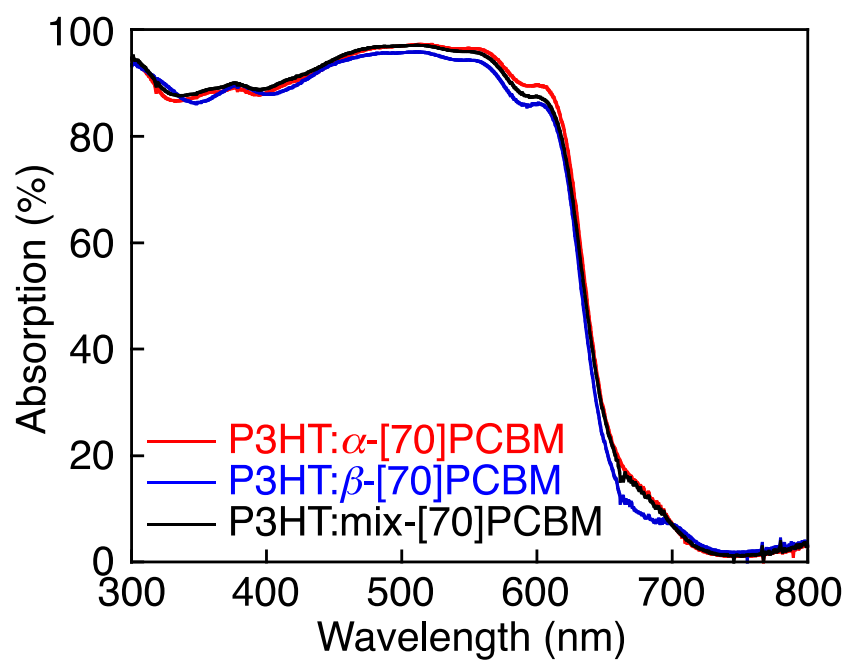

**Fig. S2** UV-visible absorption spectra of P3HT:α-[70]PCBM (red), P3HT:β-[70]PCBM (blue), and P3HT:mix-[70]PCBM (black) films on ITO/ZnO substrates.

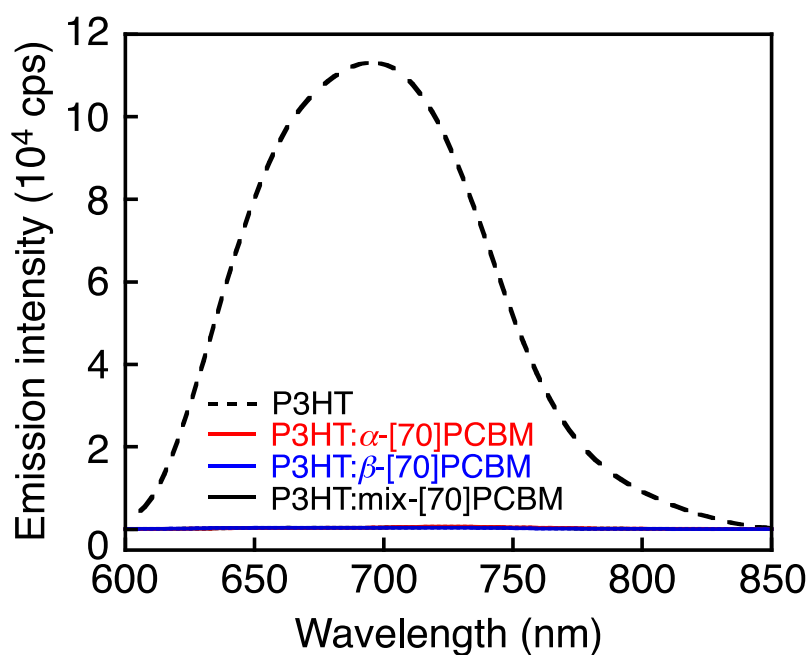

**Fig. S3** Photoluminescence spectra of pristine P3HT (black dot), P3HT:α-[70]PCBM (red), P3HT:β-[70]PCBM (blue), and P3HT:mix-[70]PCBM (black) films excited at 550 nm. The relative emission intensities can be compared by normalizing the slight difference in the absorbances of the P3HT:fullerene isomer films at the excitation wavelengths. The quenching efficiencies of P3HT fluorescence in all the blend films are > 99%.
